# Supplementary material
Source: MDPI journal article supplement (https://www.mdpi.com/2071-1050/13/10/5685)
Supplement: s1 [file s1]

Supplement of

**Assessment of emission reduction and meteorological change in PM<sub>2.5</sub> and transport flux in typical cities cluster during 2013-2017**

Panbo Guan et al.

Correspondence to Panbo Guan ([guanpb@emails.bjut.edu.cn](mailto:guanpb@emails.bjut.edu.cn))

**Table S1, (a) Descriptive Statistic of the comparison of the hourly observational temperature, relative humidity, wind speed, wind direction and WRF model simulations in Do2 region in 2013**

| Regional | Variable          | Month | Mean_obs | Mean_sim | Corr | MB    | ME   | RMSE  | NMB(%) | NME(%) |
|----------|-------------------|-------|----------|----------|------|-------|------|-------|--------|--------|
| BTH      | Wind direction    | BJ    | 167.6    | 178.5    | 0.6  | 10.9  | 13.4 | 33.5  | 6.5    | 6.7    |
|          |                   | TJ    | 192.6    | 197.0    | 0.7  | 4.4   | 13.4 | 45.4  | 12.3   | 14.0   |
|          |                   | SJZ   | 187.2    | 191.6    | 0.6  | 4.4   | 19.3 | 20.0  | 10.1   | 17.8   |
|          | Wind Speed        | BJ    | 2.1      | 3.4      | 0.8  | 0.2   | 0.5  | 0.8   | 10.1   | 23.3   |
|          |                   | TJ    | 2.8      | 3.9      | 0.9  | 0.1   | 0.8  | 1.4   | 34.2   | 39.4   |
|          |                   | SJZ   | 1.9      | 3.1      | 0.7  | 0.1   | 0.2  | 0.9   | 24.6   | 38.4   |
|          | Temperature       | BJ    | 12.3     | 11.5     | 0.9  | -0.8  | 1.2  | 2.7   | -0.6   | 0.8    |
|          |                   | TJ    | 12.1     | 12.0     | 0.9  | -0.1  | 0.3  | 2.1   | -0.9   | 1.9    |
|          |                   | SJZ   | 13.0     | 12.7     | 0.9  | -0.3  | 2.0  | 2.9   | 0.2    | 0.9    |
|          | Relative humidity | BJ    | 57.4     | 62.0     | 0.8  | 4.6   | 8.2  | 11.4  | 7.9    | 11.6   |
|          |                   | TJ    | 60.0     | 62.0     | 0.8  | 2.0   | 10.0 | 14.4  | 3.4    | 2.0    |
|          |                   | SJZ   | 63.5     | 57.0     | 0.9  | -6.5  | 13.5 | -10.3 | 17.3   | 11.6   |
| YRD      | Wind direction    | SH    | 168.9    | 186.4    | 0.6  | 17.5  | 25.1 | 39.2  | 10.3   | 15.1   |
|          |                   | NJ    | 175.1    | 143.3    | 0.3  | -21.8 | 28.0 | 60.2  | -18.2  | 23.0   |
|          |                   | HZ    | 208.8    | 191.5    | 0.8  | -17.3 | 37.2 | 38.8  | -8.3   | 10.1   |
|          | Wind Speed        | SH    | 3.0      | 3.3      | 0.6  | 0.5   | 0.8  | 1.1   | -22.4  | 30.1   |
|          |                   | NJ    | 2.9      | 3.1      | 0.5  | 0.8   | 1.3  | 1.5   | -28.3  | 30.4   |
|          |                   | HZ    | 2.5      | 3.1      | 0.9  | 0.4   | 0.5  | 0.7   | -18.4  | 20.1   |
|          | Temperature       | SH    | 18.0     | 14.2     | 0.9  | -3.8  | 2.3  | 4.8   | -2.1   | 12.3   |
|          |                   | NJ    | 17.0     | 13.1     | 0.9  | -3.9  | 4.7  | 5.8   | -3.0   | 10.3   |
|          |                   | HZ    | 18.3     | 16.9     | 0.9  | -1.3  | 1.1  | 2.8   | -7.3   | 10.5   |
|          | Relative humidity | SH    | 63.9     | 68.5     | 0.7  | 4.6   | 10.7 | 15.5  | 7.3    | 19.7   |

|  |    |      |      |     |     |      |      |     |      |
|--|----|------|------|-----|-----|------|------|-----|------|
|  | NJ | 64.3 | 68.2 | 0.7 | 3.9 | 10.9 | 12.2 | 6.1 | 15.4 |
|  | HZ | 63.8 | 65.2 | 0.8 | 0.6 | 1.4  | 10.3 | 2.2 | 7.3  |

**Table S1, (b) Descriptive Statistic of the comparison of the hourly observational temperature, relative humidity, wind speed, wind direction and WRF model simulations in Do2 region in 2014**

| Regional | Variable          | Month | Mean_obs | Mean_sim | Corr | MB    | ME   | RMSE | NMB(%) | NME(%) |
|----------|-------------------|-------|----------|----------|------|-------|------|------|--------|--------|
| BTH      | Wind direction    | BJ    | 154.9    | 155.8    | 0.7  | 10.9  | 33.5 | 44.1 | 0.9    | 10.1   |
|          |                   | TJ    | 207.0    | 196.9    | 0.6  | -10.1 | 24.9 | 44.4 | -4.9   | 10.0   |
|          |                   | SJZ   | 170.4    | 185.3    | 0.5  | 12.7  | 14.9 | 45.1 | 6.7    | 8.8    |
|          | Wind Speed        | BJ    | 2.1      | 2.5      | 0.7  | 0.2   | 0.4  | 0.7  | 10.1   | 20.6   |
|          |                   | TJ    | 2.6      | 2.8      | 0.8  | 0.3   | 0.8  | 0.8  | 15.0   | 27.5   |
|          |                   | SJZ   | 1.3      | 1.7      | 0.6  | 0.3   | 0.6  | 0.8  | 14.8   | 25.1   |
|          | Temperature       | BJ    | 14.9     | 15.1     | 0.9  | 0.4   | 1.9  | 2.4  | 0.9    | 14.7   |
|          |                   | TJ    | 14.8     | 14.2     | 0.9  | -0.6  | 0.8  | 1.1  | -4.1   | 4.9    |
|          |                   | SJZ   | 15.4     | 15.8     | 0.9  | 0.4   | 0.4  | 1.4  | 2.6    | 12.0   |
|          | Relative humidity | BJ    | 52.5     | 56.1     | 0.7  | 3.6   | 13.3 | 14.7 | 6.9    | 13.8   |
|          |                   | TJ    | 59.0     | 56.9     | 0.7  | -2.1  | 9.9  | 26.0 | -3.6   | 6.2    |
|          |                   | SJZ   | 57.2     | 51.4     | 0.8  | -5.8  | 7.2  | 11.2 | -10.2  | 17.5   |
| YRD      | Wind direction    | SH    | 146.3    | 156.1    | 0.8  | 9.8   | 42.2 | 56.2 | 6.7    | 10.3   |
|          |                   | NJ    | 150.2    | 144.7    | 0.7  | -5.6  | 47.5 | 66.0 | -3.7   | 10.4   |
|          |                   | HZ    | 192.6    | 178.9    | 0.9  | -13.6 | 35.6 | 43.6 | -14.7  | 20.2   |
|          | Wind Speed        | SH    | 2.7      | 3.7      | 0.9  | 0.2   | 0.7  | 0.9  | 3.3    | 17.3   |
|          |                   | NJ    | 2.6      | 3.6      | 0.8  | -0.2  | 0.2  | 0.7  | -8.6   | 18.3   |
|          |                   | HZ    | 2.2      | 2.7      | 0.7  | -0.2  | 0.5  | 0.7  | -29.5  | 37.3   |
|          | Temperature       | SH    | 17.3     | 14.3     | 0.9  | -3.0  | 3.3  | 4.1  | -17.1  | 21.2   |

|                   |    |      |      |     |      |      |      |      |      |
|-------------------|----|------|------|-----|------|------|------|------|------|
|                   | NJ | 16.9 | 15.3 | 0.9 | -1.6 | 2.8  | 3.1  | -9.6 | 25.8 |
|                   | HZ | 18.0 | 16.9 | 0.9 | -1.1 | 1.7  | 2.3  | -6.2 | 8.5  |
| Relative humidity | SH | 73.0 | 76.6 | 0.7 | 3.6  | 10.6 | 11.3 | 4.9  | 15.5 |
|                   | NJ | 72.9 | 73.3 | 0.8 | 0.4  | 5.3  | 9.9  | 10.5 | 20.2 |
|                   | HZ | 70.9 | 72.7 | 0.7 | 1.8  | 2.2  | 10.6 | -7.3 | 10.0 |

**Table S1, (c) Descriptive Statistic of the comparison of the hourly observational temperature, relative humidity, wind speed, wind direction and WRF model simulations in Do2 region in 2015**

| Regional | Variable          | Month | Mean_obs | Mean_sim | Corr | MB    | ME   | RMSE | NMB(%) | NME(%) |
|----------|-------------------|-------|----------|----------|------|-------|------|------|--------|--------|
| BTH      | Wind direction    | BJ    | 170.1    | 171.6    | 0.7  | 1.5   | 17.6 | 53.0 | 0.9    | 8.4    |
|          |                   | TJ    | 198.8    | 191.7    | 0.8  | -7.1  | 31.0 | 42.0 | -3.6   | 12.7   |
|          |                   | SJZ   | 182.0    | 187.5    | 0.7  | 3.4   | 5.4  | 46.3 | 3.0    | 15.1   |
|          | Wind Speed        | BJ    | 2.2      | 2.5      | 0.7  | 0.3   | 0.8  | 0.8  | 13.7   | 29.3   |
|          |                   | TJ    | 2.9      | 3.9      | 0.9  | 0.4   | 0.4  | 0.8  | 10.3   | 13.3   |
|          |                   | SJZ   | 1.8      | 2.0      | 0.6  | 0.2   | 0.4  | 0.8  | 12.1   | 20.1   |
|          | Temperature       | BJ    | 14.2     | 13.4     | 0.9  | -0.8  | 3.0  | 3.8  | -5.7   | 10.2   |
|          |                   | TJ    | 14.1     | 13.6     | 0.9  | -0.5  | 1.8  | 2.4  | -3.7   | 10.5   |
|          |                   | SJZ   | 15.1     | 14.6     | 0.9  | -0.6  | 2.8  | 3.7  | -3.7   | 20.1   |
|          | Relative humidity | BJ    | 51.9     | 56.9     | 0.7  | 5.0   | 7.1  | 15.5 | 9.6    | 14.8   |
|          |                   | TJ    | 56.0     | 53.1     | 0.5  | -2.9  | 5.4  | 16.8 | -5.2   | 16.3   |
|          |                   | SJZ   | 52.3     | 45.2     | 0.7  | -7.1  | 6.9  | 14.8 | -13.6  | 20.1   |
| YRD      | Wind direction    | SH    | 142.3    | 164.3    | 0.8  | 22.0  | 23.1 | 50.3 | 13.2   | 15.5   |
|          |                   | NJ    | 157.9    | 149.5    | 0.8  | -8.4  | 40.0 | 44.1 | -5.4   | 10.6   |
|          |                   | HZ    | 197.0    | 178.7    | 0.7  | -18.3 | 33.1 | 51.4 | -9.3   | 13.6   |
|          | Wind Speed        | SH    | 2.5      | 3.6      | 0.8  | 0.3   | 0.6  | 0.7  | 9.0    | 12.3   |

|                   |    |      |      |     |      |      |      |       |      |
|-------------------|----|------|------|-----|------|------|------|-------|------|
|                   | NJ | 2.5  | 3.4  | 0.8 | -0.1 | 0.6  | 0.7  | -14.5 | 19.0 |
|                   | HZ | 2.3  | 2.9  | 0.8 | -0.3 | 0.6  | 0.8  | -14.4 | 27.6 |
| Temperature       | SH | 17.1 | 14.6 | 0.9 | -2.5 | 2.2  | 3.9  | -4.4  | 10.5 |
|                   | NJ | 16.4 | 13.8 | 0.9 | -2.6 | 3.5  | 4.0  | -5.9  | 17.3 |
|                   | HZ | 17.6 | 15.7 | 0.9 | -1.9 | 1.9  | 3.8  | -10.6 | 18.9 |
| Relative humidity | SH | 70.8 | 77.8 | 0.6 | 7.0  | 18.8 | 15.7 | 9.9   | 21.5 |
|                   | NJ | 71.3 | 72.4 | 0.6 | 1.2  | 5.2  | 14.7 | 1.7   | 5.9  |
|                   | HZ | 71.9 | 73.2 | 0.7 | 1.4  | 7.0  | 12.0 | 1.9   | 18.0 |

**Table S1, (d) Descriptive Statistic of the comparison of the hourly observational temperature, relative humidity, wind speed, wind direction and WRF model simulations in Do2 region in 2016**

| Regional | Variable          | Month | Mean_obs | Mean_sim | Corr | MB    | ME   | RMSE | NMB(%) | NME(%) |
|----------|-------------------|-------|----------|----------|------|-------|------|------|--------|--------|
| BTH      | Wind direction    | BJ    | 163.0    | 164.1    | 0.7  | 1.1   | 44.2 | 48.4 | 6.9    | 10.2   |
|          |                   | TJ    | 183.1    | 181.3    | 0.8  | -1.8  | 20.7 | 43.0 | -9.6   | 19.2   |
|          |                   | SJZ   | 170.5    | 170.9    | 0.5  | 0.4   | 50.2 | 71.7 | 10.2   | 18.3   |
|          | Wind Speed        | BJ    | 2.2      | 2.8      | 0.6  | 0.6   | 0.8  | 1.2  | 28.4   | 30.1   |
|          |                   | TJ    | 2.9      | 3.1      | 0.9  | 0.2   | 0.5  | 0.8  | 5.6    | 15.3   |
|          |                   | SJZ   | 1.9      | 2.1      | 0.5  | 0.2   | 0.3  | 0.8  | 11.1   | 13.5   |
|          | Temperature       | BJ    | 13.6     | 12.9     | 1.0  | -0.6  | 1.9  | 3.2  | -4.6   | 11.6   |
|          |                   | TJ    | 13.6     | 13.3     | 1.0  | -0.3  | 1.1  | 2.2  | -2.1   | 6.8    |
|          |                   | SJZ   | 14.2     | 14.7     | 1.0  | 0.5   | 1.1  | 3.2  | 3.4    | 6.5    |
|          | Relative humidity | BJ    | 53.4     | 56.1     | 0.6  | 3.1   | 4.6  | 19.5 | 5.9    | 7.1    |
|          |                   | TJ    | 58.1     | 56.8     | 0.8  | -1.4  | 5.2  | 11.0 | -2.3   | 7.2    |
|          |                   | SJZ   | 61.4     | 44.4     | 0.6  | -17.0 | 17.0 | 23.6 | -17.6  | 22.6   |
| YRD      | Wind direction    | SH    | 146.1    | 162.8    | 0.8  | 16.7  | 23.5 | 44.4 | 11.4   | 13.1   |

|                   |    |       |       |     |       |      |      |       |      |
|-------------------|----|-------|-------|-----|-------|------|------|-------|------|
|                   | NJ | 149.8 | 145.5 | 0.8 | -4.3  | 30.5 | 48.6 | -2.8  | 16.6 |
|                   | HZ | 198.9 | 174.8 | 0.8 | -24.1 | 33.3 | 49.9 | -12.1 | 13.6 |
| Wind Speed        | SH | 2.6   | 3.5   | 0.8 | -0.5  | 0.5  | 0.7  | -19.3 | 27.2 |
|                   | NJ | 2.6   | 3.6   | 0.9 | 0.3   | 0.4  | 0.7  | 11.4  | 11.1 |
|                   | HZ | 2.2   | 3.0   | 0.9 | -0.2  | 0.6  | 0.7  | -9.2  | 24.3 |
| Temperature       | SH | 18.0  | 15.3  | 1.0 | -2.7  | 2.2  | 3.8  | -14.8 | 20.3 |
|                   | NJ | 16.9  | 14.1  | 0.9 | -2.8  | 2.9  | 4.3  | -16.8 | 31.2 |
|                   | HZ | 18.4  | 16.4  | 0.9 | -2.0  | 2.6  | 3.8  | -10.8 | 17.1 |
| Relative humidity | SH | 75.0  | 80.8  | 0.8 | 5.8   | 2.1  | 10.0 | 7.7   | 12.3 |
|                   | NJ | 75.9  | 79.7  | 0.8 | 3.9   | 6.8  | 9.7  | 5.1   | 7.3  |
|                   | HZ | 77.9  | 80.4  | 0.8 | 2.5   | 7.2  | 8.9  | 3.2   | 7.5  |

**Table S1, (e) Descriptive Statistic of the comparison of the hourly observational temperature, relative humidity, wind speed, wind direction and WRF model simulations in Do2 region in 2017**

| Regional | Variable          | Month | Mean_obs | Mean_sim | Corr | MB   | ME   | RMSE | NMB(%) | NME(%) |
|----------|-------------------|-------|----------|----------|------|------|------|------|--------|--------|
| BTH      | Wind direction    | BJ    | 162.3    | 166.2    | 0.7  | 3.8  | 47.4 | 49.9 | 2.4    | 12.5   |
|          |                   | TJ    | 199.0    | 190.8    | 0.7  | -8.2 | 43.5 | 58.4 | -4.1   | 12.4   |
|          |                   | SJZ   | 173.2    | 178.3    | 0.6  | 5.1  | 42.7 | 51.4 | 2.9    | 12.0   |
|          | Wind Speed        | BJ    | 2.0      | 2.4      | 0.6  | 0.4  | 0.4  | 0.9  | 17.9   | 22.2   |
|          |                   | TJ    | 2.6      | 3.5      | 0.9  | -0.1 | 0.6  | 0.9  | -3.9   | 27.1   |
|          |                   | SJZ   | 1.8      | 2.1      | 0.5  | 0.3  | 0.4  | 1.0  | 16.1   | 18.0   |
|          | Temperature       | BJ    | 14.1     | 13.0     | 1.0  | -1.1 | 2.8  | 4.8  | -7.6   | 12.8   |
|          |                   | TJ    | 14.3     | 11.4     | 0.9  | -2.9 | 2.6  | 5.9  | -20.2  | 31.8   |
|          |                   | SJZ   | 14.7     | 15.0     | 1.0  | 0.2  | 2.9  | 3.1  | 1.6    | 10.3   |
|          | Relative humidity | BJ    | 56.4     | 62.5     | 0.7  | 6.1  | 28.2 | 19.7 | 10.8   | 0.4    |

|     |                   |     |       |       |     |       |      |      |       |      |
|-----|-------------------|-----|-------|-------|-----|-------|------|------|-------|------|
| YRD |                   | TJ  | 60.3  | 71.6  | 0.5 | 11.3  | 22.2 | 35.1 | 18.7  | 0.3  |
|     |                   | SJZ | 61.7  | 50.5  | 0.8 | -11.3 | 25.2 | 18.1 | -18.3 | 0.3  |
|     | Wind direction    | SH  | 147.5 | 171.8 | 0.8 | 24.3  | 25.3 | 48.1 | 13.9  | 16.5 |
|     |                   | NJ  | 163.1 | 156.3 | 0.8 | -6.8  | 32.7 | 44.9 | -4.2  | 16.3 |
|     |                   | HZ  | 202.3 | 184.3 | 0.8 | -17.9 | 48.5 | 69.7 | -8.9  | 10.3 |
|     | Wind Speed        | SH  | 2.6   | 3.5   | 0.7 | -0.1  | 0.5  | 0.8  | -2.3  | 15.7 |
|     |                   | NJ  | 2.6   | 3.6   | 0.8 | 0.1   | 0.4  | 0.7  | 2.8   | 12.8 |
|     |                   | HZ  | 2.5   | 3.2   | 0.8 | -0.3  | 0.3  | 0.6  | -11.2 | 33.0 |
|     | Temperature       | SH  | 18.7  | 13.8  | 0.9 | -0.9  | 1.5  | 2.3  | -16.2 | 23.4 |
|     |                   | NJ  | 17.7  | 14.5  | 1.0 | -0.3  | 0.4  | 2.3  | -18.4 | 19.6 |
|     |                   | HZ  | 19.2  | 16.6  | 0.9 | -2.5  | 0.5  | 4.2  | -13.3 | 23.0 |
|     | Relative humidity | SH  | 69.4  | 83.2  | 0.6 | 6.7   | 13.9 | 19.7 | 20.0  | 37.8 |
|     |                   | NJ  | 72.5  | 79.6  | 0.8 | 7.1   | 13.1 | 14.2 | 9.8   | 15.9 |
|     |                   | HZ  | 69.2  | 75.8  | 0.6 | 4.7   | 6.6  | 14.6 | 9.5   | 15.5 |

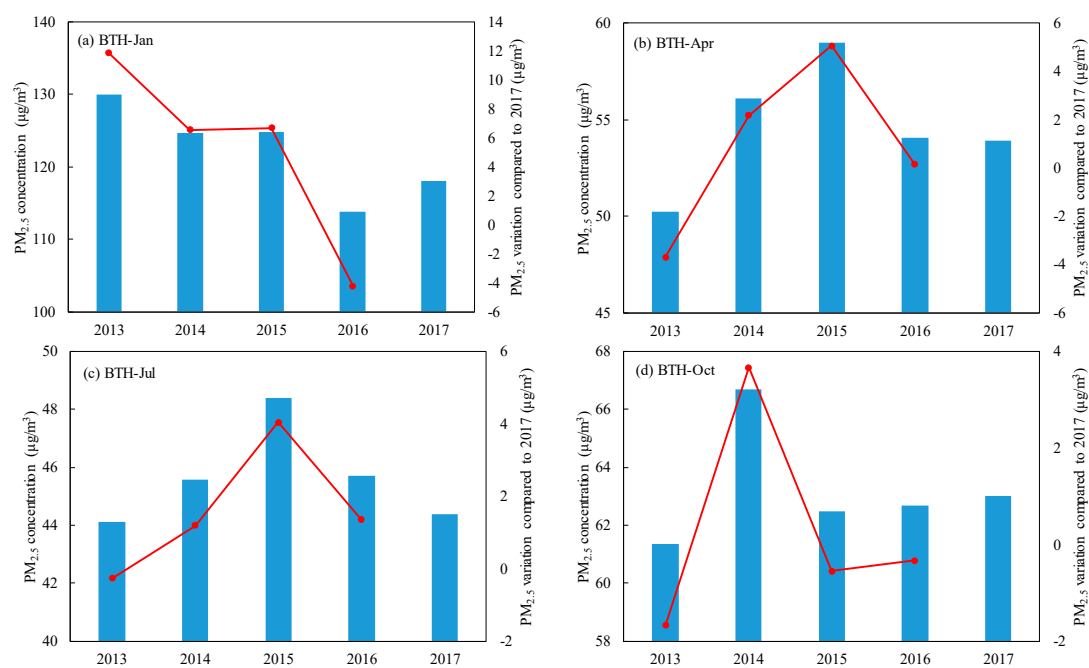

**Fig.S1** Relative contribution concentration of meteorological conditions changes in 2017 and typical month in BTH and YRD regions



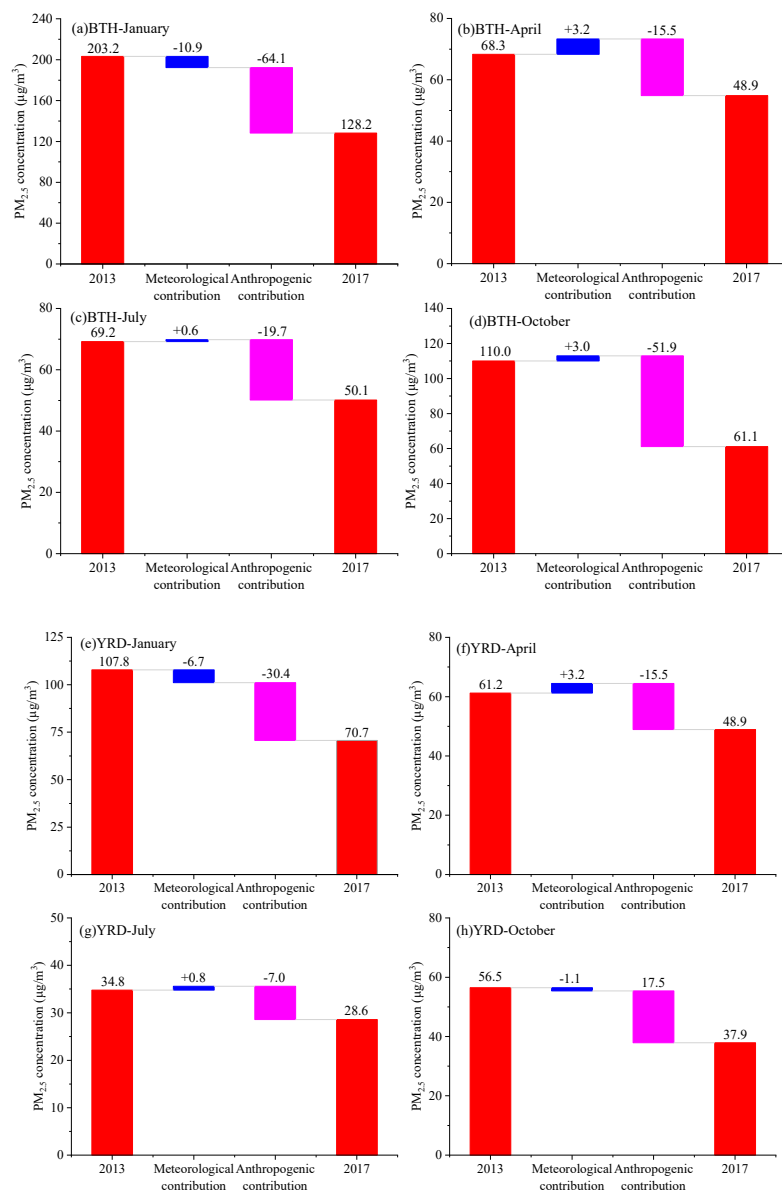

**Fig.S2** The anthropogenic and meteorological contribution of PM<sub>2.5</sub> in typical months in BTH and YRD regions

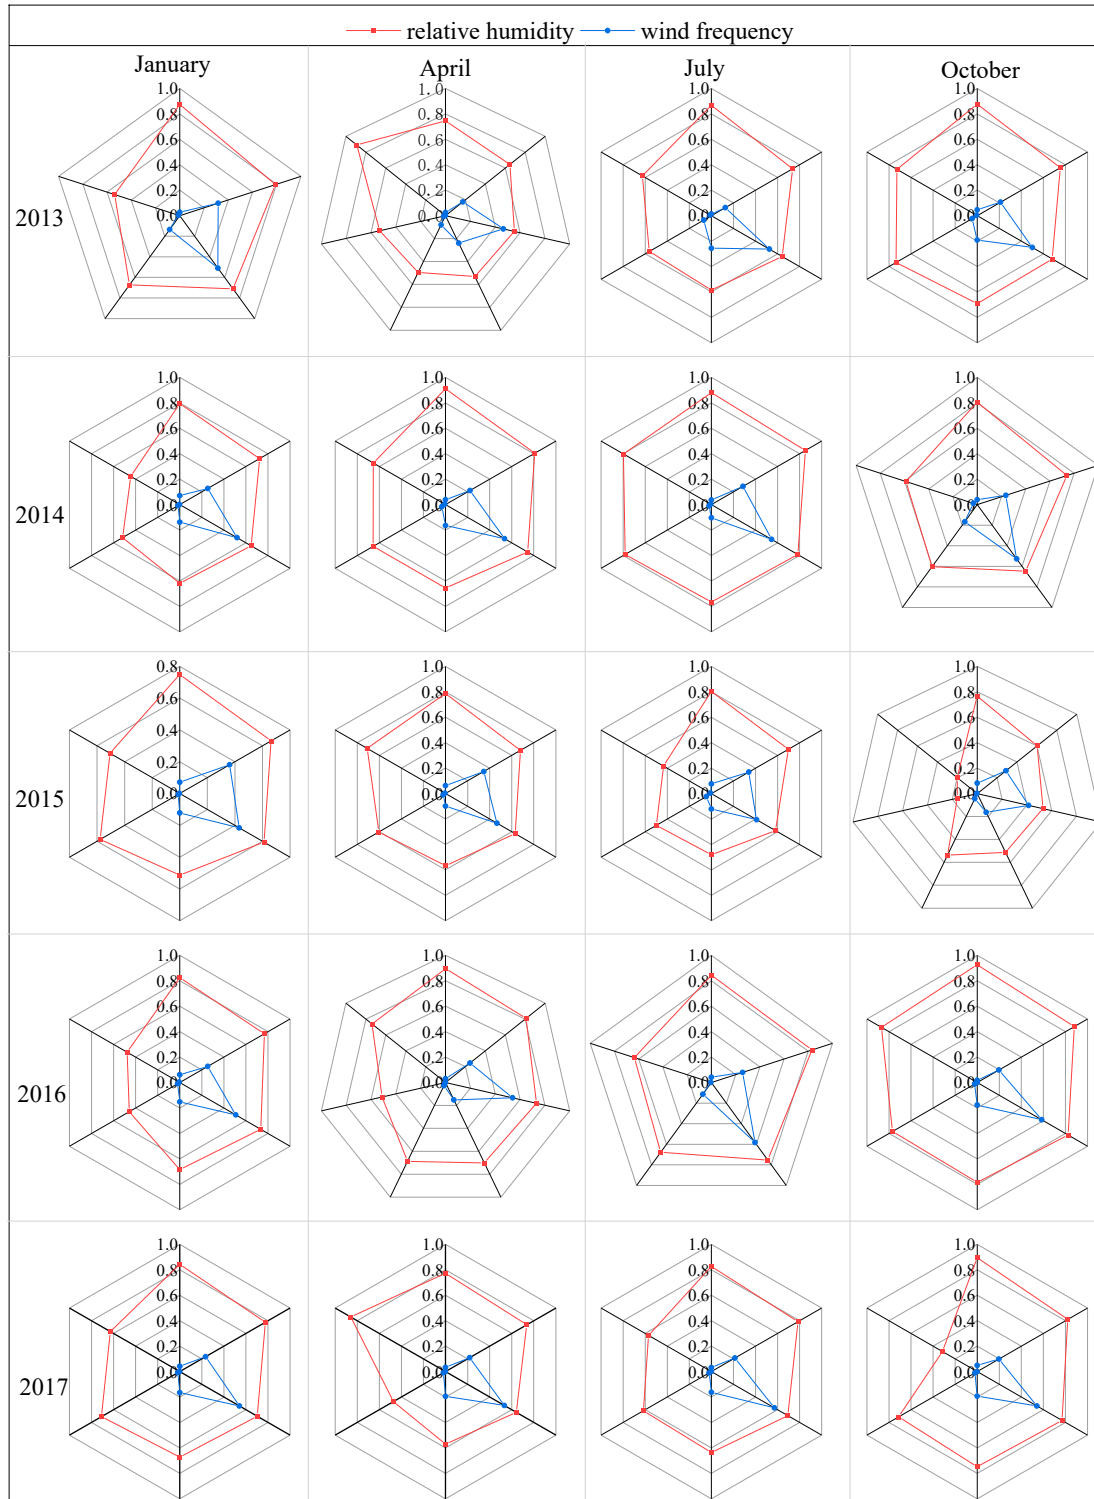

**Fig.S3** Distribution of downwind frequency and relative humidity of different grades in different years in YRD region

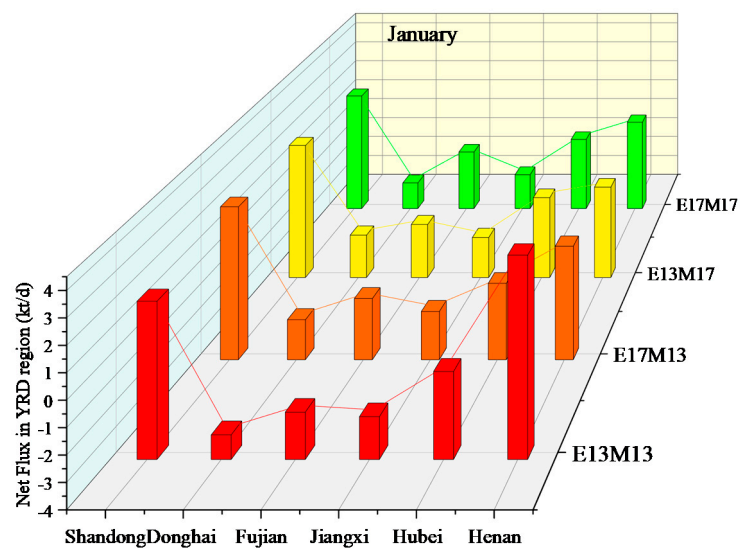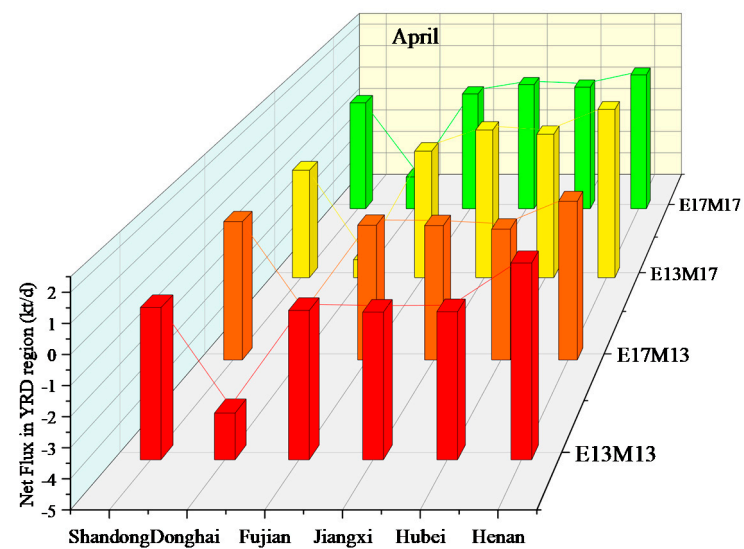

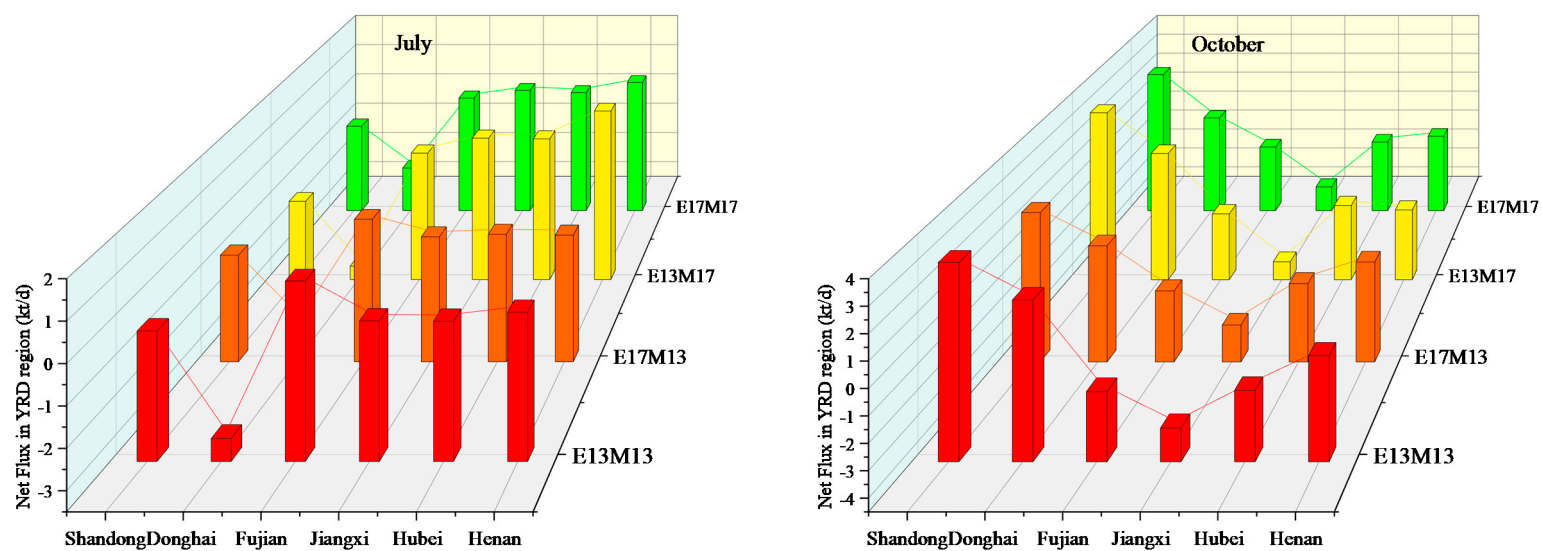

Fig.S4 The characteristics of net flux of typical month under different anthropogenic scenarios in YRD region

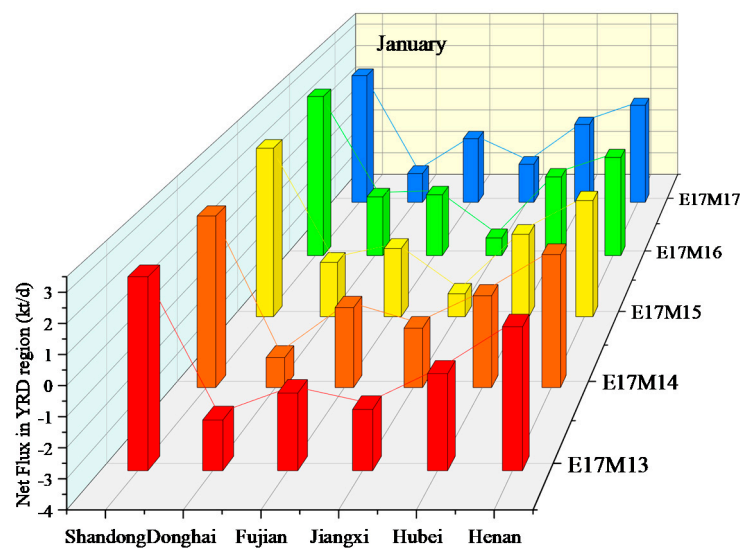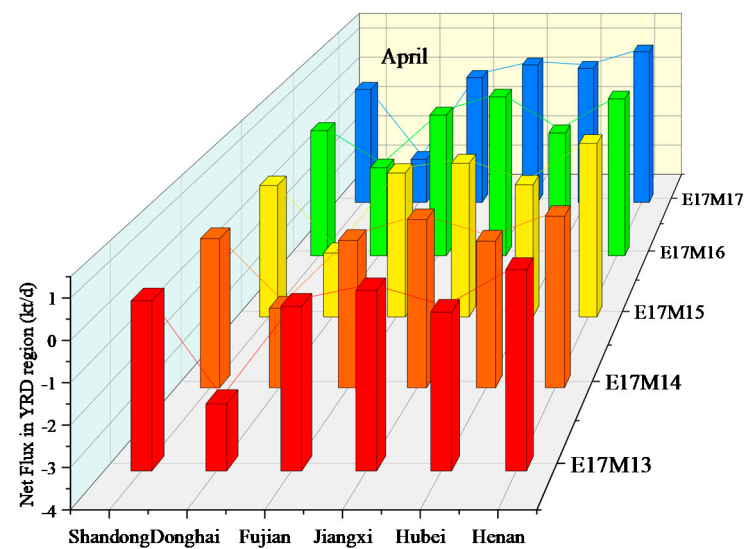

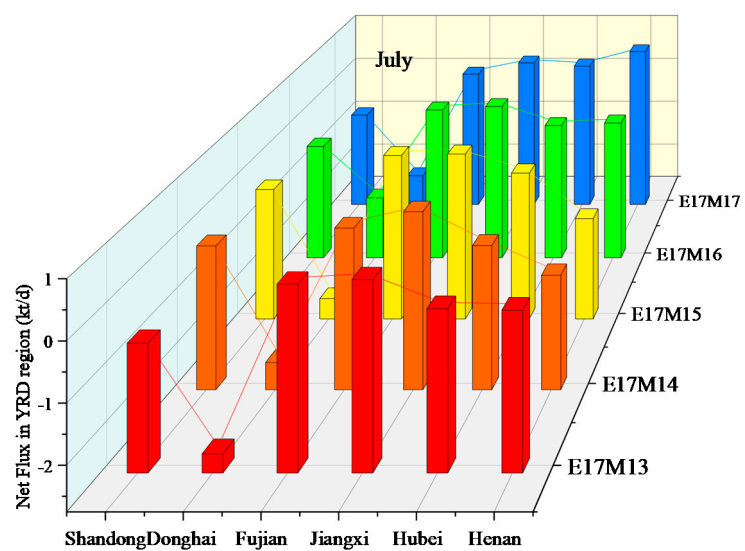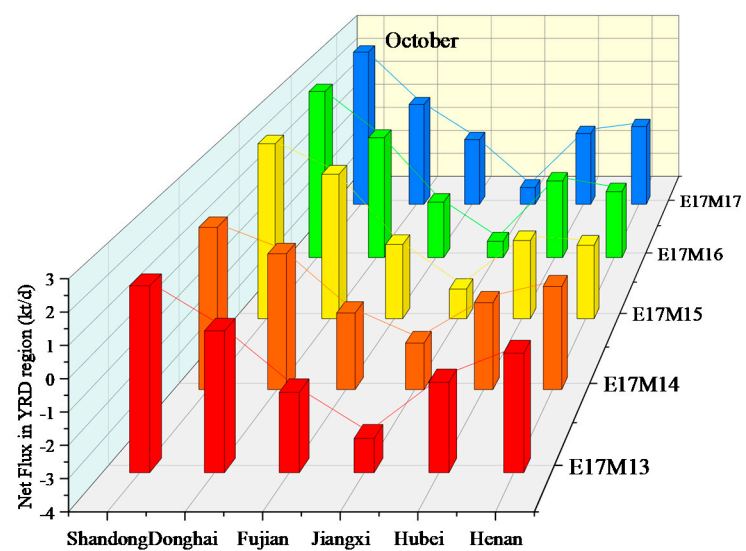

Fig.S5 The characteristics of net flux of typical month under different meteorological scenarios in YRD region
